1 **DETECTION OF *FUSARIUM OXYSPORUM* F. SP. ELAEIDIS CAUSING FUSARIUM WILT OF OIL**  
2 **PALM USING LOOP-MEDIATED ISOTHERMAL AMPLIFICATION (LAMP)**

3 *Kwasi Adusei-Fosu*

4 <sup>1</sup>*Scion, Forest Protection, 49 Sala Street.*

5 *3010 Rotorua New Zealand.*

6 *+6473435559*

7 *Kwasi.adusei-fosu@scionresearch.com*

8

9 <sup>2</sup>*Matthew Dickinson*

10 *University of Nottingham-United Kingdom.*

11 *School of Biosciences.*

12 *Plant Science Division.*

13 *LE12 5RD.*

14

15

16

17

18

19

20

21

22

23

24

25

26

27

28

## 29 Abstract

30 *Fusarium oxysporum* f. sp. *elaeidis* (FOE) a pathogen that causes fusarium wilt disease in oil palm can be detected  
31 using polymerase chain reaction (PCR) but very time consuming. Loop-Mediated Isothermal Amplification (LAMP)  
32 was used to rapidly detect *Fusarium oxysporum* f. sp. *elaeidis* (FOE) in oil palm seedlings. Eight additional *Fusarium*  
33 *oxysporum* isolates collected from symptomatic oil palm trees (i.e. presumed-FOE as their pathogenicity was not  
34 confirmed) and five other non-FOE isolates were sampled from symptomatic mature oil palm trees and tomato  
35 respectively to broaden the scope of the research. The identities of FOE, presumed-FOE and non-FOE were  
36 established via sequencing. LAMP primers designed for detecting FOE or presumed-FOE were based on partial  
37 sequences of *Secreted In Xylem (SIX8)* and *P-450* cytochrome. The earliest detection time for *SIX8* and *P-450*  
38 cytochrome primers were 4:00 mins and 6:45 mins respectively with both recording late time for detection at 26:30  
39 mins. Annealing derivative curves were used for assessing the level of specificity for both *SIX8* and *P-450* cytochrome,  
40 but none of the LAMP primers could distinguish between FOE, presumed-FOE and non-FOE.

41 **KEY words:** *Fusarium oxysporum* f. sp. *elaeidis*, *LAMP*, *Secreted In Xylem gene*, *P450 Cytochrome-oxidase*,  
42 *Diagnostics*

## 43 Introduction

44 The use of the LAMP could aid on-site detection of diseased plants [1] which drastically reduces the quantity of  
45 samples to be transported to the laboratory. This marked the beginning of several attempts made to develop real-time  
46 PCR equipment for use in the field [12, 22, 26].

47  
48 LAMP is a rapid amplification method employing a strand displacing *Bst* DNA polymerase and 4 – 6 primers, two of  
49 which are ‘fold back’ primers [14, 19] which form stem-loop motifs with self-priming capability (Fig. 1.0). The  
50 primers used are two sets, the internal primers and external primers. Subsequent studies have found the use of  
51 additional ‘loop primers’, which bind to the loop structures and greatly reduce the reaction times [14], resulting in a  
52 total of 6 primers. The 60 – 65 °C reaction temperature combined with a minimum of four primers makes LAMP a  
53 highly specific reaction. The high level of specificity results from the requirement for primers to bind up to eight  
54 regions of the target sequence. This results in an amplification scheme where the priming sequence is copied with  
55 each round of replication and remains tethered to the previous amplicon resulting in a concatenated product of  
56 alternating sense / anti-sense repeats of varied length. This results in large amounts of amplicons which can be used  
57 for further studies in detection [5].

58

59 LAMP is one of the most well established methods for isothermal amplification of nucleic acids to date. The technique  
60 has been used as a molecular tool for the detection of several plant pathogens over recent years [7, 16, 26] including  
61 fungi [11, 18, 24]. There are several reports on LAMP for detecting *Fusarium* spp. [4, 6, 8, 17, 18]. LAMP assay  
62 could detect and differentiate *F. oxysporum* f. sp. *lycopersici* (*Fol*) race 1 isolates based on the *SIX4* and *SIX5* genes  
63 using three primer sets [4]. The usefulness of the analysis of fungal cultures by direct analysis of surface scrapings  
64 from agar plate cultures, direct testing of single infected barley grains, and detection of *Fg* in total genomic DNA  
65 isolated from bulk samples of ground wheat grains has been demonstrated [18]. LAMP has been used to successfully  
66 quantify genomic DNA of *F. oxysporum* f. sp. *cubense* (*Foc*-TR4) in soil samples [29]. The sensitivity of the LAMP  
67 has also been reported [3]. Even though PCR and LAMP assays would successfully detect positive infected samples  
68 of tomato with *Fol*, considering the time, safety, cost and simplicity, the latter technique was overall superior [4]. In  
69 addition, the real-time application with the Optigene-system (Optigene, UK) has several advantages such as easy  
70 mobility or portability of the detection device. This makes it portable for field work. Unfortunately no report has been  
71 published on LAMP tool/assay to detect isolates of *Fusarium oxysporum* f. sp. *elaeidis* (FOE). Hence, there was the  
72 need to develop LAMP primers to detect FOE in inoculated oil palm seedlings and *Fusarium oxysporum* isolates  
73 collected from symptomatic mature oil palm trees (i.e. presumed-FOE as their pathogenicity had not been tested  
74 although they were collected from symptomatic oil palm in the field) to enable faster screening of oil palm seedlings  
75 prior to transplanting them to field to ensure disease free oil palm seedlings were planted.

76

## 77 **Materials and methods**

### 78 *DNA extraction, PCR and DNA sequencing*

79 A total of 40 strains were used including eight *Fusarium oxysporum* isolates (presumed-FOE) collected from  
80 symptomatic oil palm mature trees (*Elaeis guineensis*), four FOE (BOP-B5, NORP-N5, OPRI-5 and 16F) isolates  
81 confirmed to be pathogenic against oil palm seedlings and the remaining non-FOE isolates collected from tomato.  
82 The identities of all the isolates were confirmed via sequencing. Mycelia (50 - 100 mg) from cultured FOE, presumed-  
83 FOE and non-FOE were isolated from PDA plates using a sterile surgical blade. Tissue disruption was carried out  
84 using glass beads and homogenizer (FastPrep®) at a speed of 6.5 ms<sup>-1</sup> for a total time of 45 s in the presence of liquid  
85 nitrogen. DNA extractions of the cultures were then carried out using DNeasy Plant Mini Kit (Qiagen) according to  
86 the manufacturer's protocol. Polymerase chain reaction (PCR) of various regions of the template DNA was performed  
87 using primer pairs of interest (Table. S1). PCR was carried out in 30 µl volumes consisting of 15 µl of master mix  
88 (MangoTaq™ DNA Polymerase), 1 µl (of 10 pmol / ul) each of all primer pairs mentioned in separate reaction  
89 mixtures, 12 µl sterile distilled water and 1 µl of template DNA of the isolates of interest. The reaction was performed

90 in a BIO-RAD S1000 Thermal Cycler with the amplification conditions of 95 °C for 2 min for initial denaturation,  
91 followed by 35 cycles of denaturation at 95 °C for 2 min, annealing at temperatures suitable for amplification for each  
92 primer pair of interest and extension/elongation at 72 °C for 1 min 30 sec. The final extension was set at 72 °C for 5  
93 min. PCR products were cleaned using the QIAquick PCR Cleanup kit (Qiagen) following manufacturer's instruction  
94 followed gel electrophoresis using 1 kb ladder (Promega). Sequencing reactions were performed by Fisher Scientific  
95 or MyGATC. BLAST searches were performed using the GenBank sequence database to confirm the identity of the  
96 fungal isolates sequences based on the *Secreted In Xylem (SIX)* gene and *P450 cytochrome oxidase* used for amplifying  
97 the rDNA. The output from BLAST algorithms was used to query any unknown sequences against the database of all  
98 the fungal gene regions. These sequences were subsequently used to design LAMP primers.

99

100

### 101 ***Loop-Mediated Isothermal Amplification (LAMP) primer design***

#### 102 *Loop Mediated Isothermal Amplification (LAMP) assay*

103 The LAMP primers (Table S1) were self-designed from partial sequences based *Secreted In Xylem (SIX8, SIX10 and*  
104 *SIX13)* gene and *P450 cytochrome oxidase. Fusarium oxysporum* f. sp. *elaeidis* (FOE) detection assay was done by  
105 preparing the LAMP primer mix which consisted of 152 µl sterile distilled water with primer concentration of 10 µM  
106 each of the F1, B1, F2, B2 primers and 2 µM each of FIP, BIP primers. Master mix for eight reactions was prepared  
107 which consisted of 23 µl of LAMP primer mix, 46 µl sterile distilled water and 115 µl Optigene master mix (dNTPs,  
108 *Bst* DNA polymerase and MgCl<sub>2</sub>). A final volume of 21 µl in each of the eight LAMP tubes consisted of 20 µl of the  
109 reaction mix dispensed into each of the LAMP tubes and 1 µl genomic DNA. The detection time was set to 30 min  
110 for all reactions for each primer set.

111

### 112 ***Results for Loop-Mediated Isothermal Amplification (LAMP)***

113 LAMP assays were developed for two sets of genes, those encoding *Secreted In Xylem (SIX)* and the cytochrome  
114 *P450*. Results to confirm the presence or absence of FOE as well as detection time in genomic DNA of all isolates  
115 used for the study are shown in Tables 2 & 3. The amplification and derivative curves generated were also observed  
116 to confirm the specificity of the products amplified (example is shown in Fig. 2). Generally, amplification was  
117 observed at 65 °C. *SIX8* gene could amplify all FOE, some presumed-FOE and non-FOE isolates (Table 2). *SIX10* and  
118 *SIX13* could not detect FOE and presumed-FOE isolates. Generally, the detection times varied among all the genes  
119 (*SIX8* or *P450*) that were used (Tables 2 & 3). The time of detection for all the *SIX* genes was between 4:00 min to  
120 29:15 min. *P450 cytochrome* detected isolates at 6:45 min (Table 3). Both *SIX8* and *P450 cytochrome* LAMP primers

121 designed recorded a detection time below 30 min in FOE and presumed-FOE isolates. The LAMP primers were  
122 randomly tested on the sampled roots of oil palm seedlings that showed symptoms of FOE infection to confirm the  
123 sensitivity of the assay for on-site detection, and these assays were positive with the *SIX8* gene primer set but not  
124 consistent, hence results not shown.

125

## 126 **Discussions**

127 The research showed that LAMP primers could detect both FOE within inoculated oil palm seedlings and presumed-  
128 FOE (symptomatic oil palm in fields). The time for detection FOE or presumed-FOE using *SIX* gene and P450  
129 *cytochrome* primers differed but all could detect either FOE or presumed-FOE within 30 min compared to PCR which  
130 is time consuming. Although there are reports on Loop-Mediated Isothermal Amplification (LAMP) assays for  
131 detecting several *formae speciales* (f.spp.) for *Fusarium* [1, 4, 8] and other plant pathogens [27] this is the first time  
132 an attempt has been made to use LAMP for detection of *Fusarium oxysporum* f. sp. *elaeidis* (FOE).

133

134 *Secreted In Xylem (SIX)* gene, are small, secreted and well known to be cysteine-rich, first identified in the xylem sap  
135 of tomato infected with *Fol* [9, 23]. Loop Mediated Isothermal Amplification (LAMP) was successfully designed  
136 based on *SIX* genes to distinguish *Foc* from other plant pathogenic fungi [4, 27]. The detection of *Fol* with LAMP  
137 was achieved based on the 28S rRNA regions [3, 27] but unable to distinguish between pathogenic races of *Fol*  
138 isolates. The LAMP assay using the *SIX8* was positive for FOE, presumed-FOE and non-FOE. The presence or  
139 absence of some of the *SIX* genes in FOE, presumed-FOE and non-FOE used in this study is congruent with a study  
140 that showed that as of now, only fourteen *SIX* (1-14) genes have been identified and most share similarities with each  
141 other or with other fungi [28]. The LAMP assay for *SIX8* was faster for detection but detection time varied from one  
142 isolate to the other and differed as well among FOE, presumed-FOE and non-FOE. This could be because of the  
143 differences in the genomic DNA concentrations used in the study and the presence of some inhibitors as well which  
144 influenced the time of amplification. LAMP *SIX8* primer in this study, could not directly detect FOE (OPRI-5, BOPP-  
145 5, NORP-5 and 16F) isolates that were artificially inoculated into soil. On the contrary, other research could directly  
146 detect *Fol* race 1 in soil artificially inoculated based on primers designed for *SIX4* and *SIX5* [4]. Similarly, LAMP as  
147 an effective tool for detecting *Foc* race 4 isolate in soils has been reported [20].

148

149 It is reported that the *P450 cytochrome* are distributed widely in many organisms [15]. *P450 cytochrome* has been  
150 associated with pathogenicity in some fusarium such as the *F. oxysporum* f. sp. *cubense* (*Foc*) [25]. In this study, *P450*  
151 *cytochrome* was detected in FOE, presumed-FOE and non-FOE isolates. The level of *P450 cytochrome* differences

152 such as the copy numbers or gene families, significantly varies biologically across kingdoms, phyla and species [15].  
153 Furthermore, *P450 cytochrome* share conserved overall protein architecture and have many conserved sequences,  
154 despite the higher level of diversity in the *P450 cytochrome* [15]. These characteristics of the *P450 cytochrome* may  
155 have contributed to the presence in FOE, presumed-FOE and non-FOE as well as the varying time of detection. The  
156 variation in time of detection using *P450 cytochrome* LAMP primers could be because the differences in the genomic  
157 DNA concentrations isolated from FOE, presumed-FOE and non-FOE.

158  
159 Generally, LAMP primers developed in this study, either the *P450 cytochrome* or *SIX8* genes represents an extremely  
160 rapid [10] diagnostic tool for FOE. However, as at now, the assays lack the specificity required to discriminate between  
161 FOE, presumed-FOE and non-FOE isolates. However, the primers provided could potentially be used to detect or  
162 screen FOE as it is host specific to oil palm seedlings especially in nurseries to prevent the spread and introduction of  
163 the pathogen in various oil palm plantation sites.

164

#### 165 ***Acknowledgement***

166 This research was fully funded through Commonwealth Scholarship Commission-United Kingdom and I sincerely  
167 thank them for the immense excellent and outstanding support. We also thank Council for Scientific and Industrial  
168 Research – Oil Palm Research Institute, Ghana for supplying oil palm seedlings for the study. We honestly thank Dr.  
169 Julie Flood the Global Director of CABI Research for technical advice and support and the late Professor Richard  
170 Cooper former Lecturer at University of Bath – United Kingdom for providing us with two isolates of *Fusarium*  
171 *oxysporum* f. sp. *elaeidis*. Further thanks go to Dr. Y. Ndede a Scientist and Frank Dwumfour a Technician at the  
172 Council for Scientific and Industrial Research - Oil Palm Research Institute, Ghana, for the immense assistance during  
173 the field work and sampling. Our appreciation also goes to the School of Biosciences, Plant and Crop Science Division,  
174 The University of Nottingham – United Kingdom, for giving us all laboratory resources needed for this research. Our  
175 final appreciation goes to the various oil palm plantation sites where sampling was undertaken including NORPALM-  
176 Ghana, BOPP-Ghana and TOPP-Ghana.

177

178

179

180

181

## 182   **References**

- 183       Abd-Elsalam K, Bahkali A, Moslem M, Amin OE, Niesse L. An Optimized Protocol for DNA Extraction from  
184       Wheat Seeds and Loop-Mediated Isothermal Amplification (LAMP) to Detect *Fusarium graminearum*  
185       Contamination of Wheat Grain. International Journal of Molecular Science, 2011; 12: 3459-3472.
- 186       Abd-Elsalam KA, Aly IN, Mohmed A, Abdel-Satar A, Khalil MS, Verreet JA. PCR identification of Fusarium  
187       genus based on nuclear ribosomal-DNA sequence data. African Journal of Biotechnology. 2003; 4:82-85.
- 188       Almasi MA, Ojaghkand MA, Hemmatabadi A, Hamidi F, Aghaei S. Development of Colorimetric Loop-  
189       Mediated Isothermal Amplification Assay for Rapid Detection of the Tomato Yellow Leaf Curl Virus. Journal of  
190       Plant Pathology and Microbiology, 2013; 4: 153.
- 191       Ayukawa Y, Komatsu K, Kashiwa T, Akai K, Yamada M, Teraoka T, Arie T. Detection and differentiation  
192       of *Fusarium oxysporum* f. sp. *lycopersici* race 1 using loop-mediated isothermal amplification with three primer  
193       sets. Letters in Applied Microbiology, 2016; 63:202–209.
- 194       Bekele B, Hodgetts J, Tomlinson J, Boonham N, Nikolic P, Swarbrick P, Dickinson M. Use of a real-time  
195       isothermal assay for detecting 16SrII and XII phytoplasmas in fruit and weeds of the Ethiopian Rift Valley. Plant  
196       Pathology. 2011; 60:345-355.
- 197       Denschlag C, Vogel RF, Niessen L. Hyd5 gene-based detection of the major gushing-inducing Fusarium spp. in  
198       a loop-mediated isothermal amplification (LAMP) assay. International Journal of Food Microbiology, 2015;  
199       156:189-196.
- 200       Fukuta, S, Ohishi K, Yoshida K, Mizukami Y, Ishida A, Kanbe M. Development of immunocapture reverse  
201       transcription loop-mediated isothermal amplification for the detection of tomato spotted wilt virus from  
202       chrysanthemum. Journal of Virological Methods, 2004; 121:49-55.
- 203       Ghosh R, Nagavardhini A, Sengupta A, Sharma M. Development of Loop-Mediated Isothermal Amplification  
204       (LAMP) assay for rapid detection of *Fusarium oxysporum* f. sp. *ciceris* - wilt pathogen of chickpea. BMC  
205       Research Notes, 2015; 8: 40.
- 206       Houterman PM, Speijer D, Dekker HL, de Koster CG, Cornelissen BJ, Rep M. The mixed xylem sap proteome  
207       of *Fusarium oxysporum*-infected tomato plants. Molecular Plant Pathology, 2007; 8:215-21.
- 208       Kaneko H, Kawana T, Fukushima E, Suzutani T. Tolerance of loop-mediated isothermal amplification to a culture  
209       medium and biological substances. Journal for Biochemistry and Biophysics Methods, 2007; 3:499-501.
- 210       Lucas S, da Luz Martins M, Flores O, Meyer W, Spencer- Martins IJ, Ina' cio J. Differentiation of *Cryptococcus*  
211       *neoformans* varieties and *Cryptococcus gattii* using CAP59-based loop mediated isothermal DNA amplification.  
212       Clinical Microbiology and Infection, 2010; 16:711–714.
- 213       Mavrodieva V, Levy L, Gabriel DW. Improved sampling methods for real-time polymerase chain reaction  
214       diagnosis of citrus canker from field samples. Phytopathology, 2004; 94:61-68.
- 215       Mori Y, Notomi T. Loop-mediated isothermal amplification (LAMP): a rapid, accurate, and cost-effective  
216       diagnostic method for infectious diseases. Journal of Infection and Chemotherapy. 2009; 15:62-69.
- 217       Nagamine K, Watanabe K, Ohtsuka K, Hase T, Notomi T. Loop-mediated isothermal amplification reaction using  
218       a non-denatured template. Clinical Chemistry, 2001; 47:1742-1743.
- 219       Nazmul HNKHM, Hirofumi I, Hiroyuki W. Molecular characterization and isolation of cytochrome *P450* genes  
220       from the filamentous fungus *Aspergillus oryzae*. Archives of Microbiology, 2010; 192: 395–408.
- 221       Nie, X. Reverse transcription loop-mediated isothermal amplification of DNA for detection of *Potato virus Y*.  
222       Plant Disease, 2005; 89:605-610.



- 223 Niessen L. Loop-mediated isothermal amplification-based detection of *Fusarium graminearum*. Methods in  
224 Molecular Biology, 2013; 968:177-193.
- 225 Niessen L, Vogel RF. Detection of *Fusarium graminearum* DNA using a loop-mediated isothermal amplification  
226 (LAMP) assay. International Journal of Food Microbiology, 2010; 140:183-191.
- 227 Notomi T, Okayama H, Masubuchi H, Yonekawa T, Watanabe K, Amino N, Hase T. Loop-mediated isothermal  
228 amplification of DNA. Nucleic Acids Research, 2010; 28:63.
- 229 Peng J, Zhang H, Chen F, Zhang X, Xie Y, Hou X, Li G, Pu J. Rapid and quantitative detection of *Fusarium*  
230 *oxysporum* f. sp. *cubense* race 4 in soil by real-time fluorescence loop-mediated isothermal amplification. Journal  
231 of Applied Microbiology, 2014; 6:1740-1749.
- 232 Rehner S. Primers for Elongation Factor 1- $\alpha$  (EF1- $\alpha$ ), 8 August, 2001. Available from  
233 :<http://ocid.NACSE.ORG/research/deephyphae/EF1primer.pdf>
- 234 Schaad NW, Opgenorth D, Gaush P. Real-time polymerase chain reaction for one-hour on-site diagnosis of  
235 Pierce's disease of grape in early season asymptomatic vines. Phytopathology, 2002; 92:721-728.
- 236 Schmidt SM, Houterman PM, Schreiver I, Ma L, Amyotte S, Chellappan B, Boeren S, Takken FL, Rep M. MITEs  
237 in the promoters of effector genes allow prediction of novel virulence genes in *Fusarium oxysporum*. BMC  
238 Genomics, 2013; 14:119.
- 239 Sun J, Najafzadeh M, Vicente V, Xi L, De Hoog G. Microbiology Journal Methods, 2010; 80:19–24.
- 240 Sutherland R, Viljoen A, Myburg AA, Van den Berg N. Pathogenicity associated genes in *Fusarium oxysporum*  
241 f. sp. *cubense* race 4. South African Journal of Science, 2013; 109:5-6.
- 242 Tomlinson JA, Barker I, Boonham N. Faster, simpler, more-specific methods for improved molecular detection  
243 of *Phytophthora ramorum* in the field. Applied Environmental Microbiology, 2007; 73:4040–4047.
- 244 Villari C, Tomlinson JA, Battisti A, Boonham N, Capretti P, Faccoli M. Use of loop-mediated isothermal  
245 amplification for detection of *Ophiostoma clavatum*, the primary blue stain fungus associated with *Ips*  
246 *acuminatus*. Applied and Environmental Microbiology, 2013; 79:2527–2533.
- 247 Williams AH, Sharma M, Thatcher LF, Azam S, Hane JK, Sperschneider J, et al. Comparative genomics and  
248 prediction of conditionally dispensable sequences in legume–infecting *Fusarium oxysporum formae*  
249 *speciales* facilitates identification of candidate effectors. BMC Genomics, 2016; 17:191.
- 250 Zhang X, Zhang H, Pu J, Qi Y, Yu Q, Xie Y, Peng J. Development of a real-time fluorescence loop-mediated  
251 isothermal amplification assay for rapid and quantitative detection of *Fusarium oxysporum* f. sp. *cubense* tropical  
252 race 4 in soil. PLoS One, 2013; 8:12 e82841. doi: 10.1371/journal.pone.0082841.



## LIST OF FIGURES

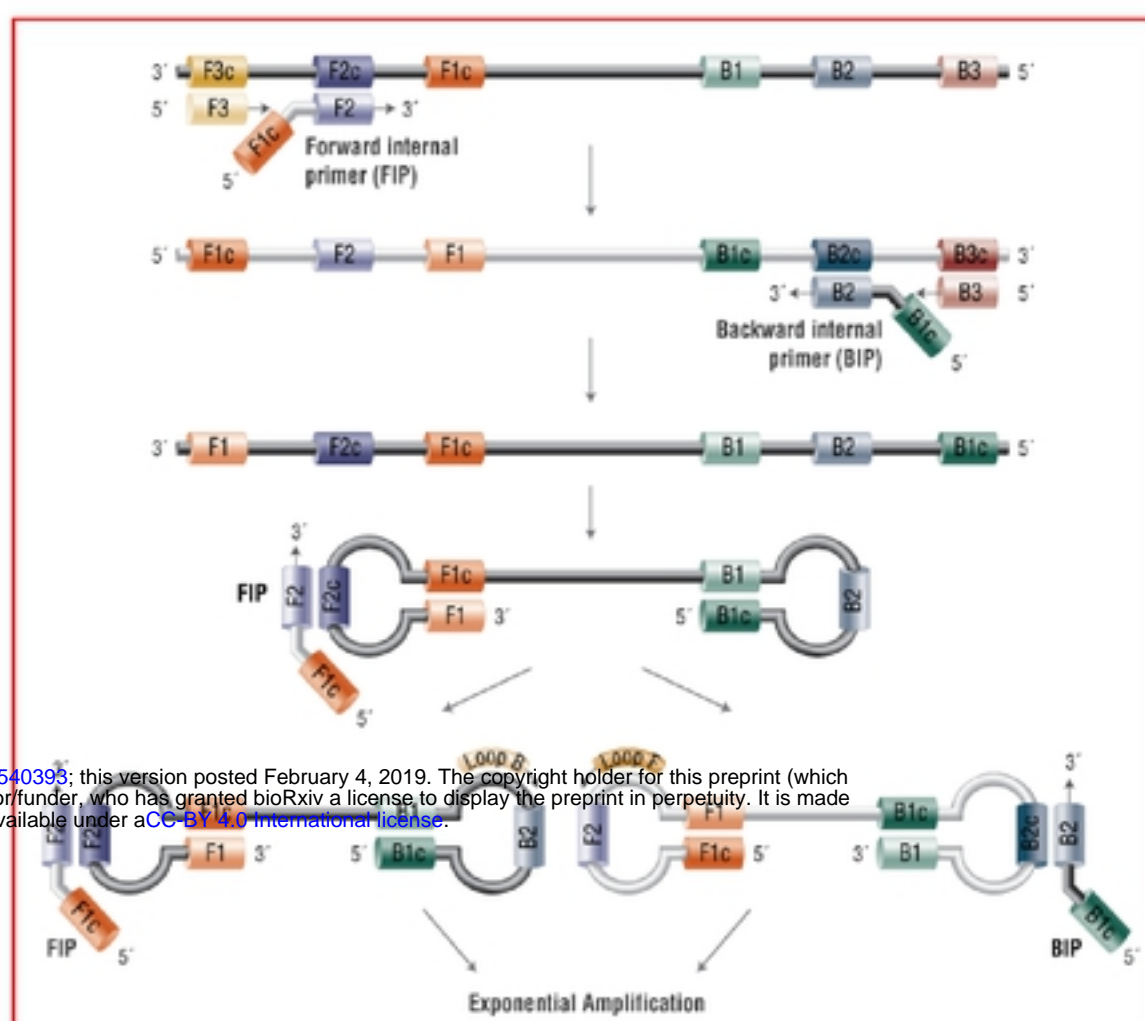

bioRxiv preprint doi: <https://doi.org/10.1101/540393>; this version posted February 4, 2019. The copyright holder for this preprint (which was not certified by peer review) is the author/funder, who has granted bioRxiv a license to display the preprint in perpetuity. It is made available under aCC-BY 4.0 International license.

Figure. 1. Loop-mediated Isothermal Amplification (LAMP) uses 4 - 6 primers recognizing 6 - 8 distinct regions of target DNA. A strand-displacing DNA polymerase initiates synthesis and 2 of the primers form loop structures to facilitate subsequent rounds of amplification (Source: <https://www.ncb.com/applications/dna-amplification-and-pcr/isothermal-amplification>).

Table.1. List of selected *Fusarium oxysporum* isolates collected from symptomatic oil palm and other fusarium isolates (non-FOE)

| <i>Fusarium</i> species                                    | Isolate code         | Location            |
|------------------------------------------------------------|----------------------|---------------------|
| <b>*<i>F.oxysporum</i> f. sp. <i>elaeidis</i></b>          | IVORY COAST-16F      | Ivory Coast         |
| <b>*<i>F.oxysporum</i> f. sp. <i>elaeidis</i></b>          | DR CONGO-F3          | DR Congo            |
| <i>F.oxysporum</i> f. sp. <i>elaeidis</i>                  | DR CONGO-Z/CBS217.49 | DR Congo            |
| <i>F.oxysporum</i> f. sp. <i>elaeidis</i>                  | SURINAME-S/CBS783.83 | Suriname            |
| <i>F.oxysporum</i> f. sp. <i>elaeidis</i>                  | GHANA NORPALM-N2     | Ghana               |
| <i>F.oxysporum</i> f. sp. <i>elaeidis</i>                  | GHANA NORPALM-N3     | Ghana               |
| <b>*<i>F.oxysporum</i> f. sp. <i>elaeidis</i></b>          | GHANA NORPALM-N5     | Ghana               |
| <i>F.oxysporum</i> f. sp. <i>elaeidis</i>                  | GHANA BOPP-B4        | Ghana               |
| <i>F.oxysporum</i> f. sp. <i>elaeidis</i>                  | GHANA BOPP-B5        | Ghana               |
| <b>*<i>F.oxysporum</i> f. sp. <i>elaeidis</i></b>          | GHANA OPRI-5         | Ghana               |
| <i>F.oxysporum</i> f. sp. <i>elaeidis</i>                  | GHANA OPRI-11        | Ghana               |
| <i>F.oxysporum</i> f. sp. <i>elaeidis</i>                  | GHANA OPRI-18        | Ghana               |
| <b>*<i>F.oxysporum</i> sp.</b>                             | Fus10B-3             | ADAS                |
| <i>F.oxysporum</i> sp.                                     | Foxy150-5            | ADAS                |
| <i>F.oxysporum</i> sp.                                     | Foxy sp-8            | ADAS                |
| <i>F.oxysporum</i> sp.                                     | Foxy2571-9           | ADAS                |
| <i>F.oxysporum</i> sp.                                     | Foxy sp-10           | ADAS                |
| <i>Fusarium</i> sp.                                        | Fus-11               | ADAS                |
| <i>F.oxysporum</i> sp.                                     | FoxyBX14/153b-A      | ADAS                |
| <i>F.oxysporum</i> sp.                                     | FoxyBX14/153a-B      | ADAS                |
| <i>F.oxysporum</i> f. sp. <i>lycopersici</i>               | Foxy.Forla-C         | UoN                 |
| <i>F.oxysporum</i> f. sp. <i>lycopersici</i>               | Foxy.Forlb-D         | UoN                 |
| <i>Fusarium solani</i> 1                                   | F1                   | UoN                 |
| <i>Fusarium solani</i> 2                                   | F2                   | UoN                 |
| <i>Fusarium oxysporum</i> f.sp. <i>radicis-lycopersici</i> | F3/ FORL A           | UoN                 |
| <i>Fusarium oxysporum</i> f.sp. <i>radicis-lycopersici</i> | F4/ FORL B           | UoN                 |
| <i>F.oxysporum</i> BX15/4a                                 | F5                   | UoN                 |
| <i>F.oxysporum</i> BX15/4b                                 | F6                   | UoN                 |
| <i>F.oxysporum</i> BX15/4c                                 | F7                   | UoN                 |
| <i>F.oxysporum</i> f. sp. <i>cubense</i> (FOC2A)           | F8                   | UoN                 |
| <i>F.oxysporum</i> f. sp. <i>cubense</i> (FOC2B)           | F9                   | UoN                 |
| <i>F.oxysporum</i> BX14/153a                               | F10                  | UoN                 |
| <i>F.oxysporum</i> BX14/153b                               | F11                  | UoN                 |
| <i>F.oxysporum</i> BX14/153c                               | F12                  | UoN                 |
| <i>F.oxysporum</i> BX14/152a                               | F13                  | UoN                 |
| <i>F.oxysporum</i> BX14/128a                               | F14                  | UoN                 |
| <i>F.oxysporum</i> BX14/168d                               | F17                  | UoN                 |
| <i>F.oxysporum</i> f. sp. <i>lycopersici</i> race 1        | F18                  | Alison Jackson (UK) |
| <i>F.oxysporum</i> f. sp. <i>lycopersici</i> race 2        | F19                  | Alison Jackson (UK) |
| <i>F.oxysporum</i> f. sp. <i>radices lycopersici</i>       | F20                  | Alison Jackson (UK) |

**\**F.oxysporum* f. sp. *elaeidis*** = FOE (i.e. Pathogenic to oil palm)

*F.oxysporum* f. sp. *elaeidis* = presumed-FOE (i.e. Pathogenicity not confirmed in oil palm though sampled from symptomatic oil palm trees)
